# Supplementary material for: Effectiveness, tolerability and safety of Direct Acting Antivirals in Mexican individuals with Hepatitis C virus genotype-1 and previous pegylated interferon and ribavirin therapy
Source: PeerJ. 2021 Sep 17;9:e12051. doi: 10.7717/peerj.12051 (PMC8451435; doi:10.7717/peerj.12051)
Supplement: Supplemental Information 3 [file peerj-09-12051-s003.xlsx]

## Sheet: Hoja1
								261 PATIENTS RECEIVING IFN / RBV TREATMENT IN 2005 TO 2014
	SEX	AGE	≥50 years	STADIUM OF THE DISEASE	CIRROHSIS	CHRONIC HEPATITIS	GENOTYPE	1/1A1B	1B	1A	IVL Log	IVL > 5.69 Log	RVR	EVRc	EVRp	SVL24	RET	SVR	NULL	RELAPSE	NR	<50 years	DIABETES	HCC
1	1	55	1	C	1	0	1B	0	1	0	5.77	0	0	0	0	1	1	0	0	1	1	0	1	0		Patients without sustained viral response
2	2	49	0	H	0	1	1	1	0	0	5.25	0	1	0	0	0	1	0	0	1	1	1	1	0
3	1	53	1	H	0	1	1B	0	1	0	5.18	0	0	0	1	0	1	0	0	1	1	0	0	0		Patients with sustained viral response
4	2	70	1	H	0	1	1A	0	0	1	6.51	1	0	1	0	0	1	0	0	1	1	0	0	0
5	1	57	0	C	1	0	1B	0	1	0	4.74	0	0	0	0	1	1	0	0	1	1	1	0	1	C	Cirrohsis
6	1	50	0	H	0	1	1A1B	1	0	0	5.67	0	0	1	0	0	1	0	0	1	1	1	0	1
7	1	57	1	H	0	1	1A	0	0	1	5.6	0	1	0	0	0	1	0	0	1	1	0	0	0	H	Chronic hepatitis
8	1	41	0	C	1	0	1A	0	0	1	5.8	1	0	0	1	0	1	0	0	1	1	1	0	0
9	1	54	1	H	0	1	1A	0	0	1	5.91	1	0	1	0	0	1	0	0	1	1	0	0	0	IVL	Initial viral load
10	1	54	1	H	0	1	1A	0	0	1	6.1	1	0	1	0	0	1	0	0	1	1	0	0	0
11	1	50	1	C	1	0	1A	0	0	1	4.34	0	0	1	0	0	1	0	0	1	1	0	0	0	RVR	Rapid viral response	at week 4
12	1	43	0	C	1	0	1A	0	0	1	6.24	1	0	1	0	0	1	0	0	1	1	1	0	0
13	1	51	1	H	0	1	1A	0	0	1	5.19	0	0	0	1	0	1	0	0	1	1	0	0	0	EVRc	Complete early viral response		at week 12
14	2	52	1	H	0	1	1B	0	1	0	6.05	1	0	1	0	0	1	0	0	1	1	0	1	0
15	2	50	1	H	0	1	1B	0	1	0	5.45	0	0	1	0	0	1	0	0	1	1	0	0	0	EVRp	Partial early viral response		at week 12
16	1	39	0	H	0	1	1A1B	1	0	0	5.87	1	1	0	0	0	1	0	0	1	1	1	0	0
17	2	48	0	C	1	0	1A	0	0	1	6.02	0	0	1	0	0	1	0	0	1	1	1	0	0	SVL24	Slow viral response at week 24
18	1	49	0	C	1	0	1A	0	0	1	5.26	0	0	1	0	0	1	0	0	1	1	1	1	0
19	2	45	0	H	0	1	1A	0	0	1	5.46	0	0	1	0	0	1	0	0	1	1	1	0	0	RET	Response at the end of treatment at week 48
20	1	54	1	H	0	1	1A	0	0	1	6.7	1	0	1	0	0	1	0	0	1	1	0	0	0
21	2	52	1	H	0	1	1A	0	0	1	6.7	1	0	0	1	0	1	0	0	1	1	0	0	0	SVR	Sustained viral response at week 24 post treatment
22	1	53	1	H	0	1	1B	0	1	0	4.88	0	1	0	0	0	1	0	0	1	1	0	0	0
23	2	56	1	C	1	0	1B	0	1	0	4.42	0	0	0	1	0	1	0	0	1	1	0	0	0	NULL	Null response
24	2	61	1	H	0	1	1B	0	1	0	6.4	1	0	0	0	1	1	0	0	1	1	0	0	0
25	1	45	0	C	1	0	1B	0	1	0	5.06	0	0	0	1	0	1	0	0	1	1	1	0	0	NR	Non-responder patient
26	1	63	1	C	1	0	1B	0	1	0	6.24	1	0	1	0	0	1	0	0	1	1	0	0	0
27	1	42	0	H	0	1	1B	0	1	0	5.5	0	1	0	0	0	0	0	0	1	1	1	0	0
28	2	42	0	H	0	1	1A	0	0	1	5.45	0	0	1	0	0	1	0	0	1	1	1	0	0
29	1	48	0	H	0	1	1B	0	1	0	5.82	1	0	1	0	0	1	0	0	1	1	1	1	0
30	1	60	1	H	0	1	1B	0	1	0	5.42	0	0	1	0	0	1	0	0	1	1	0	0	0	SEX	1 = woman, 2 = man
31	1	60	1	C	1	0	1A	0	0	1	5.7	1	0	1	0	0	1	0	0	1	1	0	0	0
32	1	41	0	H	0	1	1A	0	0	1	5.8	1	0	0	1	0	1	0	0	1	1	1	1	0		0 = no	1 = yes
33	1	58	1	H	0	1	1A	0	0	1	5.78	1	0	1	0	0	1	0	0	1	1	0	0	0
34	1	60	1	H	0	1	1A	0	0	1	5.2	0	0	1	0	0	1	0	0	1	1	0	0	0
35	1	62	1	H	0	1	1B	0	1	0	5.21	0	0	1	0	0	1	0	0	1	1	0	0	0
36	2	26	0	H	0	1	1A	0	0	1	5.7	1	0	1	0	0	1	0	0	1	1	1	0	0
37	2	31	0	H	0	1	1A	0	0	1	5.69	1	0	1	0	0	0	0	0	1	1	1	0	0
38	1	56	1	H	0	1	1A	0	0	1	5.2	0	0	1	0	0	0	0	0	1	1	0	0	0
39	2	52	1	H	0	1	1B	0	1	0	5.87	1	1	0	0	0	0	0	0	1	1	0	0	0
40	1	58	1	H	0	1	1A	0	0	1	5.78	1	0	1	0	0	0	0	0	1	1	0	1	0
41	1	55	1				1B	0	1	0	6.31	1	0	1	0	0	0	0	0	1	1	0	1	0
42	1	62	1	C	1	0	1B	0	1	0	5.87	1	1	0	0	0	0	0	0	1	1	0	0	0
43	1	40	0	H	0	1	1B	0	1	0	5.69	1	1	0	0	0	0	0	0	1	1	1	1	0
44	1	50	1	C	1	0	1A1B	1	0	0	4.8	0	1	0	0	0	0	0	0	1	1	0	0	0
45	1	56	1	H	0	1	1A1B	1	0	0	5.87	1	0	1	0	0	0	0	0	1	1	0	0	0
46	1	45	0	H	0	1	1B	0	1	0	5.61	0	1	0	0	0	0	0	0	1	1	1	0	0
47	1	57	1	C	1	0	1B	0	1	0	5.88	1	1	0	0	0	0	0	0	1	1	0	0	0
48	2	44	0				1A	0	0	1	5.82	1	0	0	0	1	0	0	0	1	1	1	0	0
49	2	51	1	H	0	1	1A	0	0	1	6.42	1	1	0	0	0	0	0	0	1	1	0	1	0
50	2	47	0	C	1	0	1	1	0	0	5.06	0	0	0	0	0	0	0	1	0	1	1	0	0
51	1	67	1	C	1	0	1B	0	1	0	5.61	0	0	0	0	0	0	0	1	0	1	0	0	0
52	1	52	1	C	1	0	1A	0	0	1	4.57	0	0	0	0	0	0	0	1	0	1	0	0	0
53	1	66	1	C	1	0	1A	0	0	1	5.65	0	0	0	0	0	0	0	1	0	1	0	0	0
54	1	55	1	H	0	1	1B	0	1	0	4.68	0	0	0	0	0	0	0	1	0	1	0	0	0
55	1	47	0	H	0	1	1B	0	1	0	5.7	1	0	0	0	0	0	0	1	0	1	1	0	0
56	2	53	1	H	0	1	1B	0	1	0	7.25	1	0	0	0	0	0	0	1	0	1	0	0	0
57	1	52	1	H	0	1	1A	0	0	1	4.36	0	0	0	0	0	0	0	1	0	1	0	0	0
58	1	48	0	H	0	1	1B	0	1	0	5.4	0	0	0	0	0	0	0	1	0	1	1	0	0
59	1	71	1	C	1	0	1B	0	1	0	6.4	1	0	0	0	0	0	0	1	0	1	0	1	0
60	2	15	0	H	0	1	1B	0	1	0	5.32	0	0	0	0	0	0	0	1	0	1	1	0	0
61	2	44	0	C	1	0	1B	0	1	0	6.72	1	0	0	0	0	0	0	1	0	1	1	0	0
62	1	40	0	C	1	0	1B	0	1	0	5.65	0	0	0	0	0	0	0	1	0	1	1	0	0
63	2	41	0	H	0	1	1B	0	1	0	5.64	0	0	0	0	0	0	0	1	0	1	1	0	0
64	2	40	0	H	0	1	1B	0	1	0	5.94	1	0	0	0	0	0	0	1	0	1	1	0	0
65	2	47	0	H	0	1	1B	0	1	0	6.43	1	0	0	0	0	0	0	1	0	1	1	0	0
66	1	43	0	H	0	1	1B	0	1	0	5.14	0	0	0	0	0	0	0	1	0	1	1	0	0
67	1	63	1	C	1	0	1B	0	1	0	6.49	1	0	0	0	0	0	0	1	0	1	0	1	0
68	1	64	1	C	1	0	1B	0	1	0	6.07	1	0	0	0	0	0	0	1	0	1	0	0	0
69	1	65	1	C	1	0	1A	0	0	1		0	0	0	0	0	0	0	1	0	1	0	1	0
70	1	62	1	H	0	1	1A	0	0	1	6.7	1	0	0	0	0	0	0	1	0	1	0	0	0
71	1			HCC	1	0	1A	0	0	1	6.22	1	0	0	0	0	0	0	1	0	1		0	1
72	1	34	0	C	1	0	1A	0	0	1	5.35	0	0	0	0	0	0	0	1	0	1	1	0	0
73	2	42	0	H	0	1	1B	0	1	0	6.43	1	0	0	0	0	0	0	1	0	1	1	0	0
74	1	60	1	C	1	0	1B	0	1	0	6.18	1	0	0	0	0	0	0	1	0	1	0	1	0
75	1	27	0	H	0	1	1A	0	0	1	6.28	1	0	0	0	0	0	0	1	0	1	1	0	0
76	1	49	0	C	1	0	1B	0	1	0	4.55	0	0	0	0	0	0	0	1	0	1	1	0	0
77	2	29	0	C	1	0	1A1B	1	0	0	5.87	1	0	0	0	0	0	0	1	0	1	1	0	0
78	1	73	1				1B	0	1	0	6.61	1	0	0	0	0	0	0	1	0	1	0	0	0
79	2	56	1				1B	0	1	0	5.31	0	0	0	0	0	0	0	1	0	1	0	0	0
80	1	42	0	C	1	0	1B	0	1	0	6.4	1	0	0	0	0	0	0	1	0	1	1	1	0
81	2	31	0	C	1	0	1A1B	1	0	0	5.69	1	0	0	0	0	0	0	1	0	1	1	0	0
82	2	32	0				1A	0	0	1	6.61	1	0	0	0	0	0	0	1	0	1	1	0	0
83	1	49	1	C	1	0	1B	0	1	0	5.66	0	0	0	0	0	0	0	1	0	1	0	0	0
84	1	50	1	H	0	1	1A	0	0	1	4.32	0	0	0	0	0	0	0	1	0	1	0	0	0
85	2	48	0	H	0	1	1B	0	1	0	5.32	0	0	0	0	0	0	0	1	0	1	1	0	0
86	1	45	0	H	0	1	1B	0	1	0	5.48	0	0	0	0	0	0	0	1	0	1	1	0	0
87	2	47	0	H	0	1	1B	0	1	0	4.92	0	0	0	0	0	0	0	1	0	1	1	0	0
88	1	50	1	C	1	0	1B	0	1	0	5.03	0	0	0	0	0	0	0	1	0	1	0	0	0
89	1	48	0	C	1	0	1A	0	0	1	5.02	0	0	0	0	0	0	0	1	0	1	1	0	0
90	1	53	1	H	0	1	1A	0	0	1	5.94	1	0	0	0	0	0	0	1	0	1	0	0	0
91	2	60	1				1B	0	1	0	5.63	0	0	0	0	0	0	0	1	0	1	0	0	0
92	1	44	0	H	0	1	1A	0	0	1	5.97	1	0	0	0	0	0	0	1	0	1	1	0	0
93	1	31	0	C	1	0	1A	0	0	1	5.6	0	0	0	0	0	0	0	1	0	1	1	0	0
94	2			H	0	1	1A	0	0	1	5.56	0	0	0	0	0	0	0	1	0	1		0	0
95	1			C	1	0	1B	0	1	0	6.6	1	0	0	0	0	0	0	1	0	1		0	0
96	1	40	0				1B	0	1	0	5.88	1	0	0	0	0	0	0	1	0	1	1	0	0
97	1	60	1	C	1	0	1B	0	1	0	6.12	1	0	0	0	0	0	0	1	0	1	0	1	0
98	2	41	0	C	1	0	1B	0	1	0	5.36	0	0	0	0	0	0	0	1	0	1	1	0	0
99	1	52	1	C	1	0	1B	0	1	0	6.1	1	0	0	0	0	0	0	1	0	1	0	0	0
100	2	40	0	H	0	1	1A1B	1	0	0	5.87	1	0	0	0	0	0	0	1	0	1	1	0	0
101	2	63	1	C	1	0	1	1	0	0	6.18	1	0	0	0	0	0	0	1	0	1	0	0	0
102	1	61	1	C	1	0	1A	0	0	1	6	1	0	0	0	0	0	0	1	0	1	0	0	0
103	2	39	0	C	1	0	1A1B	1	0	0	5.87	1	0	0	0	0	0	0	1	0	1	1	0	0
104	1	38	0	H	0	1	1B	0	1	0	5.69	1	0	0	0	0	0	0	1	0	1	1	0	0
105	1	57	1	H	0	1	1B	0	1	0	6.3	1	0	0	0	0	0	0	1	0	1	0	0	0
106	1	56	1	H	0	1	1A	0	0	1	5.96	1	0	0	0	0	0	0	1	0	1	0	0	0
107	1	51	1	C	1	0	1A	0	0	1	6.32	1	0	0	0	0	0	0	1	0	1	0	0	0
108	1	45	0				1B	0	1	0	5.8	1	0	0	0	0	0	0	1	0	1	1	0	0
109	2	38	0	C	1	0	1B	0	1	0	6.17	1	0	0	0	0	0	0	1	0	1	1	0	0
110	2	45	0	H	0	1	1B	0	1	0	5.86	1	0	0	0	0	0	0	1	0	1	1	0	0
111	1	68	1	C	1	0	1B	0	1	0	6.34	1	0	0	0	0	0	0	1	0	1	0	0	0
112	1	52	1	C	1	0	1A	0	0	1	5.93	1	0	0	0	0	0	0	1	0	1	0	0	0
113	1	71	1	C	1	0	1B	0	1	0	5.46	0	0	0	0	0	0	0	1	0	1	0	0	0
114	2	47	0	C	1	0	1A	0	0	1	5.3	0	0	0	0	0	0	0	1	0	1	1	0	0
115	1	45	0	C	1	0	1A1B	1	0	0	5.87	1	0	0	0	0	0	0	1	0	1	1	0	0
116	1	66	1	C	1	0	1A	0	0	1	6.55	1	0	0	0	0	0	0	1	0	1	0	0	0
117	1	32	0	H	0	1	1A	0	0	1	6.45	1	0	0	0	0	0	0	1	0	1	1	0	0
118	1	25	0	H	0	1	1B	0	1	0	4.68	0	0	0	0	0	0	0	1	0	1	1	1	0
119	1	*		C	1	0	1A1B	1	0	0	5.87	1	0	0	0	0	0	0	1	0	1		0	0
120	1	*		C	1	0	1B	0	1	0	5.96	1	0	0	0	0	0	0	1	0	1		0	0
121	1	60	1	C	1	0	1A	0	0	1	5.87	1	0	0	0	0	0	0	1	0	1	0	0	0
122	2	59	1	H	0	1	1B	0	1	0	6.31	1	0	0	0	0	0	0	1	0	1	0	0	0
123	2	60	1	C	1	0	1A	0	0	1	6.19	1	0	0	0	0	0	0	1	0	1	0	0	0
124	2	37	0	C	1	0	1B	1	0	0	4.33	0	0	0	0	0	0	0	1	0	1	1	0	0
125	1	40	0	C	1	0	1A1B	1	0	0	5.24	0	0	0	0	0	0	0	1	0	1	1	0	0
126	2	50	0	C	1	0	1B	0	1	0	6.44	1	0	0	0	0	0	0	1	0	1	1	0	0
127	1			H	0	1	1B	0	1	0	5.7	1	0	0	0	0	0	0	1	0	1		0	0
128	1	50	1	H	0	1	1A	0	0	1	6.26	1	0	0	0	0	0	0	1	0	1	0	1	0
129	1	45	0	C	1	0	1A1B	1	0	0	5.69	1	0	0	0	0	0	0	1	0	1	1	0	0
130	2	32	0	H	0	1	1A	0	0	1	6.38	1	0	0	0	0	0	0	1	0	1	1	0	0
131	2	26	0	H	0	1	1A	0	0	1	5.7	1	0	0	0	0	0	0	1	0	1	1	0	0
132	2			C	1	0	1B	0	1	0	6.05	1	0	0	0	0	0	0	1	0	1		0	0
133	1	69	1	C	1	0	1B	0	1	0	5.87	1	0	0	0	0	0	0	1	0	1	0	0	0
134	1	55	1	C	1	0	1A	0	0	1	5.17	0	0	0	0	0	0	0	1	0	1	0	0	0
135	2	39	0	C	1	0	1A	0	0	1	5.53	0	0	0	0	0	0	0	1	0	1	1	0	0
136	1	50	1	H	0	1	1B	0	1	0	4.22	0	0	0	0	0	0	0	1	0	1	0	0	0
137	2	51	1	H	0	1	1A	0	0	1	6.69	1	0	0	0	0	0	0	1	0	1	0	1	0
138	2	47	0	H	0	1	1B	0	1	0	5.87	1	0	0	0	0	0	0	1	0	1	1	0	0
139	1	*		H	0	1	1B	0	1	0	5.98	1	0	0	0	0	0	0	1	0	1		0	0
140	1	48	0	H	0	1	1B	0	1	0	5.31	0	0	0	0	0	0	0	1	0	1	1	0	0
141	1	60	1	C	1	0	1A	0	0	1	5.84	1	0	0	0	0	0	0	1	0	1	0	0	0
142	1	58	1	C	1	0	1A	0	0	1	5.88	1	0	0	0	0	0	0	1	0	1	0	0	0
143	2	48					1B	0	1	0	6.3	1	0	0	0	0	0	0	1	0	1	1	0	0
144	1	64	1	C	1	0	1A	0	0	1	6.66	1	0	0	0	0	0	0	1	0	1	0	0	0
145	1	55	1	H	0	1	1A	0	0	1	6.34	1	0	0	0	0	0	0	1	0	1	0	0	0
146	1	62	1	C	1	0	1B	0	1	0	6.3	1	0	0	0	0	0	0	1	0	1	0	1	0
147	1	43	0	C	1	0	1A1B	1	0	0	5.51	0	0	0	0	0	0	0	1	0	1	1	0	0
148	2			H	0	1	1B	0	1	0	6.35	1	0	0	0	0	0	0	1	0	1		0	0
149	2	51	1	C	1	0	1A1B	1	0	0	5.69	1	0	0	0	0	0	0	1	0	1	1	0	0
150	1	54	1	H	0	1	1A	0	0	1	6.2	1	0	0	0	0	0	0	1	0	1	0	0	0
151	1	48	0	H	0	1	1A	0	0	1	5.3	0	0	0	0	0	0	0	1	0	1	1	0	0
152	2	39	0	H	0	1	1A	0	0	1	6.47	1	0	0	0	0	0	0	1	0	1	1	1	0
153	2			H	0	1	1B	0	1	0	6.87	1	0	0	0	0	0	0	1	0	1		0	0
154	1	51	1	C	1	0	1B	0	1	0	6.74	1	0	0	0	0	0	0	1	0	1	1	0	0
155	1			H	0	1	1B	0	1	0	5.97	1	0	0	0	0	0	0	1	0	1		0	0
156	1	54	1	H	0	1	1A	0	0	1	5.12	0	0	0	0	0	0	0	1	0	1	0	0	0
157	2	53	1	C	1	0	1B	0	1	0	5.58	0	0	0	0	0	0	0	1	0	1	0	0	0
158	1	51	1	H	0	1	1A	0	0	1	6.19	1	0	0	0	0	0	0	1	0	1	0	1	0
159	1	31	0	H	0	1	1A	0	0	1	3.81	0	0	0	0	0	0	0	1	0	1	1	0	0
160	1			H	0	1	1	1	0	0		0	0	0	0	0	0	0	1	0	1		1	0
161	1	39	0	C	1	0	1B	0	1	0	5.55	0	0	0	0	0	0	0	1	0	1	1	0	0
162	1	54	1	H	0	1	1A	0	0	1	5.6	0	0	0	0	0	0	0	0	1	1	0	1	0
163	1	53	1	C	1	0	1B	0	1	0		0	0	0	0	0	0	0	1	0	1	0	1	0
164	1	26	0	H	0	1	1A	0	0	1	6.31	1	0	0	0	0	0	0	1	0	1	1		0
165	1	49	0	H	0	1	1A	0	0	1	5.74	1	0	0	0	0	0	0	1	0	1	1		0
166	1	48	0	H	0	1	1A	0	0	1	5.67	0	0	0	0	0	0	0	1	0	1	1		0
167	2	40	0	H			1A	0	0	1	6.7	1	0	0	0	0	0	0	1	0	1	1		0
1	2						1	1	0	0		0	1	0	0	0	1	1	0	0	0		0	0
2	2	55	1	H	0	1	1	1	0	0	6.06	1	1	0	0	0	1	1	0	0	0	0	0	0
3	1	22	0	H	0	1	1A	0	0	1	5.85	1	0	0	1	0	1	1	0	0	0	1	0	0
4	1	52	1	C	1	0	1A	0	0	1	5.81	1	0	0	0	1	1	1	0	0	0	0	0	0
5	2						1A	0	0	1	5.88	1	0	1	0	0	1	1	0	0	0		0	0
6	2	57	1	H	0	1	1A	0	0	1	4.55	0	0	1	0	0	1	1	0	0	0	0	0	0
7	2	54	1	H	0	1	1B	0	1	0	6.71	1	1	0	0	0	1	1	0	0	0	0	0	0
8	1	44	0	H	0	1	1B	0	1	0	4.33	0	0	0	1	0	1	1	0	0	0	1	0	0
9	2	59		C	1	0	1A	0	0	1	5.47	0	0	1	0	0	1	1	0	0	0	0	0	0
10	1	45	0				1A	0	0	1	5.26	0	0	1	0	0	1	1	0	0	0	1	0	0
11	1	44	0	C	1	0	1B	0	1	0	5.66	0	0	0	0	1	1	1	0	0	0	1	1	0
12	1	66	1	H	0	1	1B	0	1	0	4.74	0	0	0	1	0	1	1	0	0	0	0	0	0
13	2	36	0	H	0	1	1A	0	0	1	4.32	0	0	1	0	0	1	1	0	0	0	1	0	0
14	2	38	0				1B	0	1	0	4.93	0	1	0	0	0	1	1	0	0	0	1	0	0
15	1	61	1	H	0	1	1A	0	0	1	5.29	0	0	0	0	1	1	1	0	0	0	0	1	0
16	2						1A	0	0	1	5.67	0	1	0	0	0	1	1	0	0	0		0	0
17	2	52	1	H	0	1	1B	0	1	0	5.16	0	1	0	0	0	1	1	0	0	0	0	0	0
18	1	47	0	H	0	1	1B	0	1	0	1.96	0	1	0	0	0	1	1	0	0	0	1	0	0
19	1	48	0	H	0	1	1	1	0	0	5.67	0	0	1	0	0	1	1	0	0	0	1	0	0
20	1						1B	0	1	0	5.48	0	0	0	1	0	1	1	0	0	0		0	0
21	1	46	0				1A	0	0	1	6.07	1	1	0	0	0	1	1	0	0	0	1	0	0
22	1	65	1	C	1	0	1A	0	0	1	5.92	1	0	0	0	1	1	1	0	0	0	0	0	0
23	1	40	0	H	0	1	1B	0	1	0	5.66	0	1	0	0	0	1	1	0	0	0	1	1	0
24	1	40	0	H	0	1	1A	0	0	1	4.98	0	0	1	0	0	1	1	0	0	0	1	0	0
25	2	42	0				1B	0	1	0	5.04	0	0	1	0	0	1	1	0	0	0	1	0	0
26	1	45	0	H	0	1	1B	0	1	0	3.69	0	1	0	0	0	1	1	0	0	0	1	0	0
27	1	54	1	H	0	1	1A1B	1	0	0		0	0	0	0	1	1	1	0	0	0	0	1	0
28	1	65	1	C	1	0	1A	0	0	1		0	0	0	0	1	1	1	0	0	0	0	0	0
29	2	43	0	H	0	1	1B	0	1	0	5.13	0	0	1	0	0	1	1	0	0	0	1	0	0
30	1	30	0	H	0	1	1B	0	1	0	5.53	0	0	0	0	1	1	1	0	0	0	1	0	0
31	2	42	0				1A	0	0	1	5.26	0	0	1	0	0	1	1	0	0	0	1	0	0
32	2	47	0				1A	0	0	1	5.75	1	0	1	0	0	1	1	0	0	0	1	0	0
33	1	41	0				1A	0	0	1	4.74	0	1	0	0	0	1	1	0	0	0	1	0	0
34	1	42	0	H	0	1	1	1	0	0	4.6	0	0	0	1	0	1	1	0	0	0	1	1	0
35	2	35	0	HCC	1	0	1A1B	1	0	0	5.87	1	0	0	1	0	1	1	0	0	0	1	0	1
36	1	42	0	H	0	1	1B	0	1	0	5.26	0	0	1	0	0	1	1	0	0	0	1	1	0
37	2	42	0				1A	0	0	1	4.79	0	0	1	0	0	1	1	0	0	0	1	0	0
38	1	68	1	C	1	0	1A	0	0	1	6.54	1	0	0	1	0	1	1	0	0	0	0	1	0
39	1	45	0	H	0	1	1A1B	1	0	0	5.14	0	0	1	0	0	1	1	0	0	0	1	0	0
40	2						1A	0	0	1	5.09	0	1	0	0	0	1	1	0	0	0		1	0
41	2	60	1	C	1	0	1B	0	1	0	4.98	0	0	0	1	0	1	1	0	0	0	0	0	0
42	2						1B	0	1	0	4.82	0	1	0	0	0	1	1	0	0	0		0	0
43	1	55	1	H	0	1	1B	0	1	0	4.54	0	0	1	0	0	1	1	0	0	0	0	0	0
44	1						1B	0	1	0	6.75	1	0	1	0	0	1	1	0	0	0		0	0
45	1	50	1	H	0	1	1A1B	1	0	0	5.49	0	1	0	0	0	1	1	0	0	0	0	0	0
46	2	32		H	0	1	1A1B	1	0	0	5.87	1	0	1	0	0	1	1	0	0	0	1	0	0
47	2		1				1A	0	0	1	4.8	0	0	1	0	0	1	1	0	0	0	0	0	0
48	1	50	1	C	1	0	1A1B	1	0	0	4.9	0	1	0	0	0	1	1	0	0	0	0	0	0
49	1	22	0	H	0	1	1B	0	1	0	4.72	0	0	1	0	0	1	1	0	0	0	1	0	0
50	2	45	0	H	0	1	1B	0	1	0	3.06	0	1	0	0	0	1	1	0	0	0	1	0	0
51	2	36	0	H	0	1	1B	0	1	0	4.02	0	1	0	0	0	1	1	0	0	0	1	0	0
52	1	43	0	H	0	1	1A	0	0	1		0	0	0	0	1	1	1	0	0	0	1	0	0
53	2	44	0				1A	0	0	1	5.03	0	1	0	0	0	1	1	0	0	0	1	0	0
54	2	49	0				1A	0	0	1	5.65	0	0	1	0	0	1	1	0	0	0	1	1	0
55	1	46	0	H	0	1	1A	0	0	1	6.17	1	0	1	0	0	1	1	0	0	0	1	0	0
56	2	44	0				1A	0	0	1	5.91	1	1	0	0	0	1	1	0	0	0	1	0	0
57	2	50	0	H	0	1	1A	0	0	1	5.54	0	0	0	1	0	1	1	0	0	0	1	1	0
58	1	48	0				1A	0	0	1	4.91	0	1	0	0	0	1	1	0	0	0	1	0	0
59	1	47	0				1B	0	1	0	7.21	1	0	1	0	0	1	1	0	0	0	1	0	0
60	1	52	1	H	0	1	1A	0	0	1	3	0	1	0	0	0	1	1	0	0	0	0	0	0
61	2	51	1	C	1	0	1A	0	0	1	3.02	0	0	1	0	0	1	1	0	0	0	0	0	0
62	1						1B	0	1	0	5.93	1	0	1	0	0	1	1	0	0	0		0	0
63	1	38	0	H	0		1A	0	0	1	5.91	1	0	1	0	0	1	1	0	0	0	1	0	0
64	1						1	1	0	0		0	0	1	0	0	1	1	0	0	0		0	0
65	1	56	1	H	0	1	1B	0	1	0	5.8	1	0	1	0	0	1	1	0	0	0	0	0	0
66	1						1A	0	0	1	5.59	0	0	1	0	0	1	1	0	0	0		1	0
67	1	53	1	H	0	1	1B	0	1	0	5.73	1	0	0	0	1	1	1	0	0	0	0	0	0
68	2	45	0	H	0	1	1B	0	1	0	5.87	1	0	1	0	0	1	1	0	0	0	1	0	0
69	1			H	0	1	1B	0	1	0	5.31	0	0	1	0	0	1	1	0	0	0		0	0
70	2	54	1	H	0	1	1B	0	1	0	5.43	0	1	0	0	0	1	1	0	0	0	0	0	0
71	1						1A	0	0	1	5.79	1	0	1	0	0	1	1	0	0	0		0	0
72	1						1A	0	0	1	5.11	0	1	0	0	0	1	1	0	0	0		0	0
73	2	45	0	H	0	1	1B	0	1	0	5.45	0	0	0	0	1	1	1	0	0	0	1	0	0
74	2	47	0	H	0	1	1B	0	1	0	5.6	0	0	1	0	0	1	1	0	0	0	1	0	0
75	1						1A	0	0	1	5.62	0	1	0	0	0	1	1	0	0	0		0	0
76	2	28	0	H	0	1	1B	0	1	0	5.84	1	0	0	0	1	1	1	0	0	0	1	0	0
77	2	42	0				1B	0	1	0	5.51	0	0	0	1	0	1	1	0	0	0	1	0	0
78	2						1B	0	1	0	4.94	0	0	1	0	0	1	1	0	0	0		0	0
79	2	45	0	H	0	1	1A	0	0	1	5.99	1	0	1	0	0	1	1	0	0	0	1	0	0
80	1	52	1	H	0	1	1B	0	1	0	5.74	1	0	1	0	0	1	1	0	0	0	0	0	0
81	1						1A	0	0	1	5.88	1	0	0	1	0	1	1	0	0	0		0	0
82	2	40	0	C	1	0	1B	0	1	0	4.62	0	0	0	1	0	1	1	0	0	0	1	0	0
83	2						1A	0	0	1	5.25	0	0	0	1	0	1	1	0	0	0		0	0
84	1	22	0	H	0	1	1A	0	0	1	4.7	0	0	0	1	0	1	1	0	0	0	1	0	0
85	1	48	0				1B	0	1	0	5.56	0	1	0	0	0	1	1	0	0	0	1	0	0
86	1						1A	0	0	1	6.15	1	0	1	0	0	1	1	0	0	0		0	0
87	1	44	0				1A1B	1	0	0	5.83	1	0	0	1	0	1	1	0	0	0	1	0	0
88	2	56	1	C	1	0	1B	0	1	0	4.37	0	0	0	0	1	1	1	0	0	0	0	0	0
89	1	58	1	H	0	1	1A	0	0	1	4.91	0	1	0	0	0	1	1	0	0	0	0	0	0
90	1	51	1	H	0	1	1B	0	1	0	4.2	0	0	0	0	1	1	1	0	0	0	0	0	0
91	2						1A	0	0	1	5.11	0	0	0	1	0	1	1	0	0	0		0	0
92	1	44	0	H	0	1	1B	0	1	0		0	0	0	0	1	1	1	0	0	0	1	0	0
93	1	54	1	H	0	1	1B	0	1	0	6.21	1	0	1	0	0	1	1	0	0	0	0	1	0
94	2						1B	0	1	0	5.51	0	0	1	0	0	1	1	0	0	0		0	0

## Sheet: Hoja2
									NR patients to INF-RBV treatment who did not attend to receive treatment with DAA from 2017 to 2018
		SEX	AGE	STADIUM OF THE DISEASE	GENOTYPE	IVL	RVR	EVRc	EVRp	SVL24	RET	SVR	NULL	RELAPSE	LEAKAGE	NR	1	1A	1B	1A1B	IVL ≤ 5.56	Cirrhosis	Chronic hepatitis	Diabetes	hepatocellular carcinoma	deceased until 2014
1	1	1	55	C	1B	5.77	0	0	1	1	1	0	0	1	0	1	0	1	0	0	0	1	0	1	0	0
2	3	1	53	H	1B	5.18	0	1	0	1	1	0	0	1	0	1	0	1	0	0	1	0	1	0	0	0
3	8	1	41	C	1A	5.8	0	1	0	1	1	0	0	1	0	1	1	0	0	0	0	1	0	0	0	0
4	9	1		H	1A	5.91	1	0	0	1	1	0	0	1	0	1	1	0	0	0	1	0	1	0	0	0		C	cirrohsis
5	10	1	54	H	1A	6.1	1	0	0	1	1	0	0	1	0	1	1	0	0	0	1	0	1	0	0	0
6	14	2	52	H	1B	6.05	1	0	0	1	1	0	0	1	0	1	0	1	0	0	1	0	1	1	0	0		H	chronic hepatitis
7	16	1	39	H	1A1B	5.87	0	0	0	1	1	0	0	1	0	1	0	0	1	0	1	0	1	0	0	0
8	19	2	45	H	1A	5.46	1	0	0	1	1	0	0	1	0	1	1	0	0	0	1	0	1	0	0	0		IVL	initial viral load
9	20	1	54	H	1A	6.7	1	0	0	1	1	0	0	1	0	1	1	0	0	0	1	0	1	0	0	0
10	21	2	52	H	1A	6.7	0	1	0	1	1	0	0	1	0	1	0	0	0	0	1	0	1	0	0	0		RVR	rapid viral response	at week 4
11	22	1	53	H	1B	4.88	0	0	0	1	1	0	0	1	0	1	0	1	0	0	1	0	1	0	0	0
12	24	1	54	H	1A	5.6	0	0	0	0	1	0	0	1	0	1	1	0	0	0	1	0	1	0	0	0		EVRc	complete early viral response		at week 12
13	25	1	45	C	1B	5.06	0	1	0	1	1	0	0	1	0	1	0	1	0	0	0	1	0	0	0	0
14	27	1	42	H	1B	5.5	0	0	0	0	1	0	0	1	0	1	0	1	0	0	1	0	1	0	0	0		EVRp	partial early viral response		at week 12
15	28	2	42	H	1A	5.45	1	0	0	1	1	0	0	1	0	1	1	0	0	0	0	0	1	0	1	0
16	29	1	48	H	1B	5.82	1	0	0	1	1	0	0	1	0	1	0	1	0	0	1	0	1	1	0	0		SVL24	slow viral response at week 24
17	30	1	60	H	1B	5.42	1	0	0	1	1	0	0	1	0	1	0	1	0	0	1	0	1	0	0	0
18	31	1	60	C	1A	5.7	1	0	0	1	1	0	0	1	0	1	1	0	0	0	1	1	0	0	0	0		RET	response at the end of treatment at week 48
19	32	1	41	H	1A	5.8	0	0	1	0	1	0	0	1	0	1	0	0	1	0	0	0	1	1	0	0
20	33	1	58	H	1A	5.78	1	0	0	1	1	0	0	1	0	1	1	0	0	0	1	0	1	0	0	0		SVR	sustained viral response at week 24 post treatment
21	34	1	60	H	1A	5.2	1	0	0	1	1	0	0	1	0	1	1	0	0	0	1	0	1	0	0	0
22	35	1	62	H	1B	5.21	1	0	0	1	1	0	0	1	0	1	0	1	0	0	1	0	1	0	0	0		NULL	null response
23	36	2	26	H	1A	5.7	1	0	0	1	1	0	0	1	0	1	1	0	0	0	1	0	1	0	1	0
24	37	2	31	H	1A	5.69	1	0	0	0	0	0	1	0	1	1	1	0	0	0	1	0	1	0	0	0		NR	non-responder patient
25	39	2	52	H	1B	5.87	0	0	0	0	1	0	0	1	0	1	0	1	0	0	0	0	1	0	0	0
26	40	1	58	H	1A	5.78	1	0	0	0	0	0	1	0	1	1	1	0	0	0	1	0	1	1	0	0
27	46	1	45	H	1B	5.61	0	1	0	0	0	0	0	0	1	1	0	1	0	0	0	0	1	0	0	0
28	50	2	47	C	1	5.06	0	0	0	0	0	0	0	|	0	1	0	1	0	0	0	1	0	0	0	0
29	51	1	67	C	1B	5.61	0	0	0	0	0	0	1	0	0	1	0	0	1	0	1	1	0	0	0	0		SEX	1 woman, 2 man
30	54	1	55	H	1B	4.68	0	0	0	0	0	0	1	0	0	1	0	1	0	0	0	0	1	0	0	0
31	56	2	53	H	1B	7.25	0	0	0	0	0	0	1	0	0	1	0	1	0	0	1	0	1	0	0	0			0 no	1 yes
32	57	1	52	H	1A	4.36	0	0	0	0	0	0	1	0	0	1	1	0	0	0	1	0	1	0	0	0
33	58	1	48	H	1B	5.4	0	0	0	0	0	0	1	0	0	1	0	1	0	0	1	0	1	0	0	0
34	59	1	71	C	1B	6.4	0	0	0	0	0	0	1	0	0	1	0	1	0	0	0	1	0	1	0	0
35	60	2	15	H	1B	5.32	0	0	0	0	0	0	1	0	0	1	0	1	0	0	1	0	1	0	0	0
36	65	2	47	H	1B	6.43	0	0	0	0	0	0	1	0	0	1	0	1	0	0	1	0	1	0	0	1
37	66	1	48	C	1B	4.31	0	0	0	0	0	0	1	0	0	1	0	1	0	0	1	1	0	0	0	0
38	68	1	64	C	1A1B	6.07	0	0	0	0	0	0	1	0	0	1	0	0	0	1	1	1	0	0	0	1
39	80	1	42	C	1B	6.4	0	0	0	0	0	0	1	0	0	1	0	1	0	0	0	1	0	1	0	0
40	84	1	50	H	1A	4.32	0	0	0	0	0	0	1	0	0	1	1	0	0	0	1	0	1	0	0	0
41	86	1	45	H	1B	5.48	0	0	0	0	0	0	1	0	0	1	0	1	0	0	0	0	1	0	0	0
42	88	1	50	C	1B	5.03	0	0	0	0	0	0	1	1	0	1	0	0	0	0	0	1	0	0	0	0
43	89	1	48	C	1A	5.02	0	0	0	0	0	0	1	0	0	1	0	1	0	0	0	1	0	0	0	0
44	92	1	44	H	1A	5.97	0	0	0	0	0	0	1	0	0	1	1	0	0	0	1	0	1	0	0	0
45	93	1	31	C	1A	5.6	0	0	0	0	0	0	1	0	0	1	1	0	0	0	1	1	0	0	0	0
46	95	1		C	1B	6.6	0	0	0	0	0	0	1	0	0	1	0	1	0	0	1	1	0	0	0	0
47	96	1	40		1B	5.88	0	0	0	0	0	0	1	0	0	1	0	1	0	0	1	0	1	0	0	0
48	97	1	60	C	1B	6.12	0	0	0	0	0	0	1	0	0	1	0	1	0	0	1	1	0	1	0	0
49	98	2	41	C	1B	5.36	0	0	0	0	0	0	1	0	0	1	0	1	0	0	0	1	0	0	0	0
50	99	1	52	C	1B	6.1	0	0	0	0	0	0	1	0	0	1	0	1	0	0	0	1	0	0	0	0
51	106	1	56	H	1A1B	5.96	0	0	0	0	0	0	1	0	0	1	0	0	0	1	1	0	1	1	0	1
52	107	1	51	C	1A	6.32	0	0	0	0	0	0	1	0	0	1	1	0	0	0	0	1	0	0	0	0
53	109	2	38	C	1B	6.17	0	0	0	0	0	0	1	0	0	1	0	1	0	0	0	1	0	0	0	0
54	110	2	45	H	1A1B	5.86	0	0	0	0	0	0	1	0	0	1	0	0	0	1	1	0	1	0	0	1
55	113	1	71	C	1B	5.46	0	0	0	0	0	0	1	0	0	1	0	1	0	0	1	1	0	0	0	0
56	116	1	66	C	1A	6.55	0	0	0	0	0	0	1	0	0	1	1	0	0	0	1	1	0	0	0	0
57	122	2	59	H	1B	6.31	0	0	0	0	0	0	1	0	0	1	0	1	0	0	1	0	1	0	0	0
58	124	2	37	C	1B	4.33	0	0	0	0	0	0	1	0	0	1	0	1	0	0	0	1	0	0	0	0
59	126	2	50	C	1B	6.44	0	0	0	0	0	0	1	0	0	1	0	1	0	0	0	1	0	0	0	0
60	127	1		H	1B	5.7	0	0	0	0	0	0	1	0	0	1	0	1	0	0	1	0	1	0	0	0
61	128	1	50	H	1A	6.26	0	0	0	0	0	0	1	0	0	1	1	0	0	0	1	0	1	1	0	0
62	130	2	32	H	1A	6.38	0	0	0	0	0	0	1	0	0	1	1	0	0	0	0	0	1	0	0	0
63	133	1	69	C	1B	5.87	0	0	0	0	0	0	1	0	0	1	0	1	0	0	0	1	0	0	0	0
64	134	1	55	C	1A	5.17	0	0	0	0	0	0	1	0	0	1	1	0	0	0	0	1	0	0	0	0
65	135	2	39	C	1A	5.53	0	0	0	0	0	0	1	0	0	1	1	0	0	0	0	1	0	0	0	0
66	136	1	50	H	1B	4.22	0	0	0	0	0	0	1	0	0	1	0	1	0	0	0	0	1	0	0	0
67	137	2	51	H	1A	6.69	0	0	0	0	0	0	1	0	0	1	1	0	0	0	1	0	1	1	0	0
68	138	2	47	H	1B	5.87	0	0	0	0	0	0	1	0	0	1	0	1	0	0	0	0	1	0	0	0
69	140	1	48	H	1B	5.31	0	0	0	0	0	0	1	0	0	1	0	1	0	0	1	0	1	0	0	0
70	141	1	60	C	1A	5.84	0	0	0	0	0	0	1	1	0	1	0	0	0	0	0	1	0	0	0	0
71	142	1	58	C	1A	5.88	0	0	0	0	0	0	1	0	0	1	1	0	0	0	1	1	0	0	0	0
72	144	1	64	C	1A	6.66	0	0	0	0	0	0	1	1	0	1	0	0	0	0	1	1	0	0	0	0
73	145	1	55	H	1A	6.34	0	0	0	0	0	0	1	0	0	1	1	0	0	0	0	0	1	0	0	0
74	150	1	54	H	1A	6.2	0	0	0	0	0	0	1	0	0	1	1	0	0	0	0	0	1	0	0	0
75	151	1	48	H	1A	5.3	0	0	0	0	0	0	1	1	0	1	0	0	0	0	0	0	1	0	0	0
76	156	1	54	H	1A	5.12	0	0	0	0	0	0	1	0	0	1	1	0	0	0	0	0	1	0	0	0
77	157	2	53	C	1B	5.58	0	0	0	0	0	0	1	0	0	1	0	1	0	0	0	1	0	0	0	0
78	158	1	51	H	1A	6.19	0	0	0	0	0	0	1	0	0	1	1	0	0	0	0	0	1	1	0	0
79	159	1	31	H	1A	3.81	0	0	0	0	0	0	1	0	0	1	1	0	0	0	1	0	1	0	0	0
80	161	1	39	C	1B	5.55	0	0	0	0	0	0	1	0	0	1	0	1	0	0	0	1	0	0	0	0
81	163	1	53	C	1B	5.58	0	0	0	0	0	0	1	0	0	1	0	0	1	0	0	1	0	1	0	0
82	164	1	26	H	1A	6.31	0	0	0	0	0	0	1	0	0	1	0	1	0	0	0	0	1	0	0	0
83	165	1	49	H	1A	5.74	0	0	0	0	0	0	1	0	0	1	0	1	0	0	0	0	1	0	0	0
84	166	1	48	H	1A	5.67	0	0	0	0	0	0	1	0	0	1	0	1	0	0	0	0	1	0	0	0
85	167	2	40	H	1A	6.7	0	0	0	0	0	0	1	0	0	1	0	1	0	0	0	0	1	0	0	0

## Sheet: Hoja3
	Age 2005-2015	Sex	YOD	YWI	STADIUM OF THE DISEASE	Genotype 2005-2014	IVL INF-RBV	NULL INF-RBV	RELAPSE INF-RBV	TREATMENT DAAs 2017	RIBAVIRIN	RIBAVIRIN DOSE	DURATION OF TREATMENT IN WEEKS	GENOTYPE 2017	Coinfección	AGE 2017	SEX	Steatosis FibroScan	METAVIRi	Clinical stage	TBi	ALB i	ALTi	ASTi	PTSi	INRi	CPS i	AFTi	IVL date	IVLi DAAS	Viral load at the end of treatment week 12	Viral load 12 weeks after end of treatment	Alcoholism	DM	Tabaquismo	Obesity	TB end	ALB end	ALT end	AST end	INR end	PTS end	AFT end	CPS end	APRIi	APRI end	FIB-4i	FIB-4f
1	71	1	2014	3	C	1B	6	1	0	6041			12	1b	0	73	1	G2	F4	C	1.2	3.5	85	78	85	1.26	CPS-A		2017-06-01	5.99	<12	neg	0	1	0	0	0.85	4.2	31	33	1.19	107	6.39	C-CP-A	2.69	0.97	7.07	3.93
2	40	1	2006	11	H	1B	5.88	1	0	6041			12	1b	0	50	1	G1	F4	C		2.9	63	62	133	1.03	CPS-A	24.1	2017-07-01	5.7	1.55log	<12	0			0	0.58	3.8	23	27	1.06	163	10.8	C-CP-A	1.39	0.48	2.35	1.38
3	41	2	2006	11	C	1B	5.36	1	0	6041			12	1b	0	53	2	N	F3F4	C	4.19	4.1	21	25	143	0.97	CPS-A	16.3	2017-06-01	6.19	<12	<12	0			0	1.76	4.6	16	22	1.1	170	5.7	C-CP-A	0.51	0.38	1.56	1.33
4	34	2	2005	12	C	1B	6.17	1	0	6041			12	1b	0	46	2	G1	F4	C	2.08	3.9	73	46	60	1.17	CPS-A	4.92	2017-07-01	6.6	<12	<12	1	0	0	0	1.29	4.5	34	53	1.23	59	1.9	C-CP-A	3.06	2.64	3.05	5.24
5	39	1	2005	13	H	1B	6.9	0	1	6041			12	1b	0	61	1	G3	F4	C	0.63	3.9	21	34	168	1.09	CPS-A	14.8	2017-06-01	7.07	<12	<12	0			0	0.68	4.5	17	31	1.25	209	11.7	C-CP-A	0.59	0.43	1.72	1.4
6	45	1	2005	13	H	1B	5.61	0	1	6041			12	1b	0	57	1	N	F1	H	2.55	3.9	67	49	261	0.95		5.6	2017-06-01	5.87	<12	<12	0			0	1.36	4.1	22	28	0.85	292	4		0.55	0.31	2.2
7	62	1	2011	8	H	1B	5.21	0	1	6041			12	1b	0	69	1	G1	F1	H	1.01	3.9	29	39	265	1.06		3.82	2017-06-01	5.21	<12	<12	0	1		0	1.11	4.3	15	23	1.16	238	3.76		0.43	0.25	1.21	1.31
8	53	1	2008	9	H	1B		1	0	6041			12	1b	0	61	1	G2	F3	H	0.88	3.6	28	32	146	1.14		14.6	2017-06-01	6.24	<12	<12	1	0	1	0								C-CP-A	0.66		5.47	3.54
9	53	1	2007	10	H	1B	4.88	0	1	6041			12	1b	0	63	1	G2	F1	H	1.38	4.3	31	23	137	1.07		2.4	2017-06-01	4.97	<12	<12	0			0	0.63	4.3	15	15	1.01	163	1.7		0.27	0.27	5.26	2.14
10	47	2	2014	3	H	1B	6.43	1	0	6041			12	1b	0	50	2	G1	FOF1	C	0.71	3.9	66	56	142	0.91	CPS-A	4.88	2017-06-01	5.97	<12	neg	1	0	1	0	0.93	4.3	26	29	0.97	216	1.8	C-CP-A	1.16	0.39	11.92	5.07
11	39	1	2008	9	H	1B	5.7	1	0	6041			12	1b	0	39	1	N	F3F4	C	0.71	3.6	50	47	214	1.08	CPS-A	8.14	ND	ND	<12	<12				0	0.47	4.2	15	28	1.04	231	5.18		0.65	0.36	6.77	3.78
12	50	1	2015	2	H	1B	4.22	1	0	6041			12	1b	0	52	1	N	F4	C	0.54	3.5	100	117	107	1.24	CPS-A	12.8	2017-08-01	4.73	<12	<12	0	0	0	1	0.64	4.2	35	44	1.23	105	7.58	C-CP-A	3.21	1.23	6.95	2.41
13	58	1	2010	7	H	1B	5.82	0	1	6041			12	1b	0	65	1	G3	F1	H		3.5	92	69	256				2017-07-01	5.51	<12	<12	0	1	0	0	1.31	3.9	24	26	1.09	277	4.6		0.79	0.27	5.9	3.19
14	64	1	2014	3	H	1B	6.07	1	0	6041			12	1b	0	57	1	N	F3	C	0.96	3.5	148	141	141	1.12	CPS-A	6.9	2017-08-01	4.92	neg	neg				1	0.74	3.9	22	26	1.25	166	4.7		2.94	0.66	5.49	5.22
15	67	1	2008	9	H	1B	5.61	1	0	6041			12	1b	0	76	1	N	F1	H	1.38	4	15	22	94	1.09		1.94	1900-03-28	5.36	neg	neg	0	0	0	0	1.84	4.4	10	19	1.24	109	1.7		0.68	0.51	5.58	3.18
16	60	1	2015	2	C	1B	6.12	1	0	6041			12	1b	0	60	1	N	F4	C	1.18	3.5	98	118	60	1.2	CPS-A	38.1	2017-08-01	4.99	neg	neg	0	0	0	0	0.91	3.7	36	54	1.26	53	14.4	C-CP-A	5.74	2.99	5.8	3.3
17	46	1	2010	8	H	1A	5.8	0	1	6041	5920	1200	12	1a	0	54	1	G3	F2	H	0.9	3.7	27	29	244	0.88			2017-08-01	6.1	neg	neg	0	0	0	1	0.48	3.8	15	20	0.95	252	1.5		0.32	0.23	8.76	11.6
18	45	1	2009	8	H	1B	5.48	1	0	6041			12	1b	0	53	1	N	F4	C	1.74	4	174	129	65	1.05	CPS-A	11.6	2017-08-01	5.4	<12	neg	0	0	0	1	1.37	4.2	24	28	1.15	68	4.5	C-CP-A	5.87	1.21	2.16	1.33
19	42	1	2005	12	H	1B	5.5	0	1	6041			12	1b	0	54	1	G1	FOF1	H	0.59	4	137	76	128	0.92		3.52	2017-08-01	5.3	1.08log	neg	0	0	0	0	0.76	4.1	19	24	1.01	133	2.4		1.79	0.53		3.46
20	52	1	2009	8	C	1B	6.1	1	0	6041			12	1b	0	60	1	G1	F3F4	C	0.91	3.6	134	116	75	1.09	CPS-A		1900-03-28	6.2	<12	neg	0	0	0	1	0.84	4.3	19	18	1.12	89	7.6	C-CP-A	4.54	0.6	1.03	0.92
21	45	2	2009	8	H	1B	5.86	1	0	6041			12	1b	0	50	2	N	F3	H	0.9	3.4	87	104	85				2017-08-01	5.48	<12	neg	0	0	0	1	1.25	3.8	15	28	1.15	102	3.7		3.59	0.8	1.69	1.55
22	51	1	2014	3	H	1A	6.79	1	0	6041	5920	1000	12	1a	0	54	1	N	FOF1	H		3.7	52	55	304	1.1			2017-08-01	6.95	neg	neg	0	0	0	0	2.99	3.9	19	26	1.1	259	5.6		0.53	0.29	1.6	1.26
23	47	2	2005	12	H	1B	5.8	1	0	6041			12	1b	0	59	2	N	F1	H	1.08	3.7	118	72	115	1.02		18.2	2017-08-01	6.47	<12	1.6log	0	0	0	0	1.01	4.5	20	27	1.11	88	4.9		1.84	0.92	2.28	1.24
24	58	1	2011	6	C	1A	5.88	1	0	6041			12	1b	0	64	1	N	F4	C	0.71	3.8	57	65	91	1	CPS-A	28.5	2017-08-01	5.14	neg	neg	0	0	0	1	0.79	4.3	33	45	1.15	87	8.5	C-CP-A	2.01	1.52	1.63	1.11
25	52	2	2005	13	H	1B	5.37	0	1	6041			12	1b	0	65	2	G2	FOF1	C	1.23	4.3	49	46	136	1.03	CPS-A	2.6	2017-08-01	5.48	neg	neg	0	0	1	1	1.61	4.8	23	30	1.05	142	1.9	C-CP-A	0.99	0.62	4.05	1.41
26	45	2	2008	9	H	1A	5.43	0	1	6041	5920	1000	12	1a	0	53	2	N	FOF1	H	2.03	4.4	29	26	142	1.02			2017-08-01	5.43	neg	neg	0	0	1	0	1.15	4.2	13	18	1.19	114	6.9		0.53	0.46	1.05	0.61
27	31	2	2015	2	H	1A	5.69	0	1	6041	5920	1000	12	1a	0	33	2	G1	FOF1	H		3.7	38	36	269	0.9		1.84	2017-09-01	5.73	5.29log					0	0.49	4.2	37	31	0.99	331	1.3		0.39	0.27	2.13
28	48	1	2015	2	H	1A	5.67	1	0	6041	5920	1000	12	1a	0	50	1	G3	FOF1	H	0.96	3.7	151	158	202	1.02			2017-09-01	5.36	neg	neg	0	0	0	0	0.62	3.8	14	21	1.06	226	1.7		2.12	0.27	1.28	1.17
29	60	1	2013	4	C	1A	5.84	1	0	6041	5920	1000	12	1a	0	64	1	G2	F4	C	0.89	3.6	96	93	107	1.1	CPS-B	10.6	2017-09-01	5.77	neg	neg	0	0	0	0	0.89	3.9	16	25	1.13	118	5	C-CP-A	2.55	0.62	2.71	3.22
30	54	1	2015	2	H	1A	6.7	0	1	6041	5920	1000	12	1a	0	56	1	N	FOF1	H	0.81	4	42	45	230	1.02		1.9	2017-09-01	6.91	Detectado	Detectado		0	1	0	0.75	4.2	14	21	1.08	136	1.8		0.57	0.45	2.51	2.3
31	48	1	2012	5	H	1B	5.31	1	0	6041			12	1b	0	53	1	G1	F4	C	0.76	3.2	92	80	69	1.08	CPS-A	274	2017-09-01	5.15	neg	neg	0	1	0	1	0.6	4.1	25	33	1.13	96	12.8	C-CP-A	3.41	1.01	1.53	1.97
32	47	2	2014	3	H	1	5.06	1	0	6041			12	1b	0	50	2	N	F1	H	0.26	3.9	67	68	344	0.94		10.9	2017-11-01	5.4	Detectado	neg	0	0	0	1	0.38	3.9	18	24	1.04	313	3		0.65	0.22	0.66	0.48
33	15	1	2013	4	H	1B	5.32	1	0	6041			12	1b	0	19	1	G1	F1	H	0.52	4.1	22	23	174	0.99		1.84	2017-11-01	5.5	neg	neg	0	0	0	0	0.7	4.6	14	22	1.13	173	1.33		0.38	0.37	3.06	1.19
34	65	1	2010	7	H	1B	5.06	0	1	6041			12	1b	0	52	1	G3	F3F4	C		3.7	24	30	329	1.08	CPS-A	1.85	2017-11-01	4.3	Detectado	neg	0	1	0	1	0.59	3.5	14	25	1.09	335	1.8		0.28	0.22	1.63	2.23
35	53	2	2011	6	H	1B	7.25	1	0	6041			12	1b	0	59	2	G2	F3	H	0.75		64	61	146	0.92		8.85	2017-12-01	6.1	neg	neg	1	0	1	0	0.8	4	27	31	1.02	181	3.9		1.23	0.54	1.14	0.85
36	76	1			C	1B	6.6	1	0	6041			12	1b	0	73	1	G2	F4	C		3.2	38	54		1.14	CPS-A	3.46	2017-12-01	5.09	neg	neg	0	0	0	1	0.67	3.1	36	62	1.16	71	2.7	C-CP-A		2.56	0.42	0.51
37	48	1	2012	5	C	1B	4.31	1	0	6041			12	1b	0	53	1	N	F4	C	0.76	4.3	42	44	151	1.31	CPS-A		2018-01-01	3.5	neg	neg	0	0	0	0	0.92	4.5	42	36	1.21	201	3.24	C-CP-A	0.81	0.52	1.21	1.13
38	55	1	2013	4	H	1A	6.34	1	0	6041	5920	1000	12	1a	0	61	1	N	F0F1	H	0.82	4	30	35	145	1.03		3.24	2018-01-01	5.54	neg	neg	0	0	0	0	1.74	4.6	31	39	1.1	150	3.24		0.71	0.76	2.77	1.75
39	50	1			H					6041															37					6.41	neg	neg					1.45	4.8	24	37	1.16	109	5	CCP-A		2	2.37	2.57
	Age 2005-2015	SEX	YOD	YWI	STADIUM OF THE DISEASE	Genotype 2005-2014	IVL INF-RBV	NULL INF-RBV	RELAPSE INF-RBV	TREATMENT DAAs 2017	RIBAVIRIN	RIBAVIRIN DOSE	DURATION OF TREATMENT IN WEEKS	GENOTYPE 2017	Coinfección	AGE 2017	SEX	Steatosis FibroScan	METAVIR FibroScan	Clinical stage	TBi	ALB i	ALTi	ASTi	PTSi	INRi	CPS i	AFTi	IVL date	IVLi DAAS	viral load at the end of treatment week 12	viral load 12 weeks after end of treatment	Alcoholism	DM	Tabaquismo	Obesity	TB end	ALB end	ALT end	AST end	INR end	PTS end	AFT end	CPS end	APRIi	APRI end	FIB-4i	FIB-4f
1	42	2	2005	12	H	1A	5.45	0	0	6052	5920	1200	12	1a	0	53	2	EHG1	F4	C	1	4	50	44	103	1.03	C-CP-A	4.26	1900-04-05	5.3	<12	neg	0	0	0	1	1	4.4	18	22	1.02	146	3.3	C-CP-A	1.25	0.44	2.54	1.49
2	44	1	2009	8	C	1A1B	5.4	1	0	6052	5920	1000	12	1b	0	52	1	N	F4	C	2.63	4	72	112	98	1.35	C-CP-B		2017-07-01	4.36	neg	neg	0	0	1	0	1.22	4.2	134	86	1.4	79		C-CP-A	3.36	3.2	5.93	4.14
3	41	1	2005	12	H	1A	5.8	0	1	6052	5920	1000	12	1a	0	53	1	EHG2	F4	C	0.92	3.6	163	114	186	1.17	C-CP-A	7.6	2017-07-01	5.58	neg	neg	0	0	0	0	1.5	4.4	50	49	1.25	178	3.14	C-CP-A	1.8	0.81	1.97	1.6
4	26	2	2008	9	H	1A	5.7	0	1	6052			12	1a	0	35	2	EHG2	FOF1	H	1.63	4.4	79	40	236	0.94		1.98	2017-07-01	5.73	neg	neg	0	0	0	0	1.12	4.6	24	26	0.98	229	1.34		0.49	0.33	0.5	0.58
5	50	1	2012	5	H	1A	4.32	1	0	6052			12	1a	0	56	1	N	F3	H	1.06	3.5	125	92	193	1.02		4.75	2017-08-01	4.79	neg	neg	0	0	0	1	1.09	4	28	31	1.07	206	3.35		1.4	0.44	2.13	1.42
6	55	1	2010	7	H	1B	4.68	1	0	6052			12	1a	0	61	1	EHG3	F3F4	C	0.86	4.2	60	58	179	0.93		3.8	2017-08-01	4.03	neg	neg	0	0	0	0	0.93	4.1	23	28	1.02	180	2.6		0.95	0.46	2.3	1.78
7	56	1	2012	5	H	1A	3.01	1	0	6052	5920	1000	12	1a	0	61	1	N	F4	C	0.91	3.9	74	97	86	1.17	C-CP-A	47.7	1900-03-18	6	<12	neg	0	0	0	0	0.51	4.2	15	28	1.21	78	4.9	C-CP-A	3.31	1.05	7.34	5.2
8	60	1	2010	8	C	1A	5.57	0	1	6052	5920	1000	12	1a	0	68	1	N	F4	C	1.03	3.5	29	47	77	1.22	C-CP-A	6.19	2017-08-01	4.95	neg	neg	0	0	0	0	1.18	3.7	20	32	1.26	84	5.9	C-CP-A	1.79	1.12	6.8	5.11
9	48	1	2009	8	C	1A	5.02	1	0	6052	5920	1200	12	1a	0	55	1	N	F4	C	1.1	3.9	78	86	50	0.98	C-CP-A	9.73	2017-08-01	7.14	<12	neg	0	0	0	1	1.19	4.3	22	30	1.07	53	6	C-CP-A	5.05	1.66	9.35	5.8
10	66	1	2013	4	H	1A	6.55	1	0	6052	5920	1200	12	1a	0	70	1	N	F4	C	0.82	3.7	166	166	109	1.09	C-CP-A	18.3	2017-08-01	6.28	neg	neg	0	1	0	1	0.61	4.1	17	63	1.09	104	5.4	C-CP-A	4.47	1.78	7.8	9.7
11	59	2	2009	8	H	1B	6.31	1	0	6052	5920	1000	12	1b	0	59	2	N	F3	H	1.37	4.2	105	93	103			4.4	2017-08-01	6.4	<12	neg	0	0	0	0	1.27	4.5	27	36	1.1	100	1.4		2.65	1.06	5.2	4.1
12	26	1	2014	3	H	1A	5.74	1	0	6052			12	1a	0	29	1	N	F3	H	0.48	3.9	84	79	217	0.94		24.7	2017-08-01	5.58	<12	Detectado	0	0	0	0	0.48	4.4	19	24	1.1	206	6.3		1.12	0.34	1.03	0.69
13	49	1	2014	3	H	1A	5.88	1	0	6052			12	1a	0	52	1	EHG1	FOF1	H	0.3	4	43	48	298	1.06		8.3	2017-08-01	6	Detectado	neg	0	0	0	0									0.47		1.2
14	54	1	2014	3	H	1A	5.12	1	0	6052	5920	1200	12	1a	0	57	1	N	FOF1	H	0.88	3.3	63	93	95	1.08	C-CP-B		2017-08-01	4.3	neg	neg	0	0	0	1	1.06	3.6	21	38	1.23	112	3.9	C-CP-A	2.87	0.99	6.66	2.17
15	55	1	2008	10	C	1A	5.17	1	0	6052	5920	1000	12	1a	0	65	1	N	F4	C	1.42	3.1	46	33	49	0.94	C-CP-B	1.08	2017-08-01	5.26	neg	neg	0	0	0	1	0.88	4.1	16	22	1.39	46	9	C-CP-A	1.98	1.4	5.46	6.6
16	69	1	2005	13	C	1B	5.87	1	0	6052	5920	1000	12	1b	0	82	1	N	F4	C	1.35	3.2	53	100	104	1.22	C-CP-B	39.6	2017-08-01	5.62	neg	neg	0	0	0	0	1.43	3.2	31	61	1.37	76	10.7	C-CP-A	2.82	2.36	9.11	9.95
17	51	2	2012	5	H	1A	6.59	1	0	6052	5920	1000	12	1a	0	56	2	N	F1	H	0.75	3.8	40	35	145	1.04		2.5	2017-08-01	6.93	neg	neg	0	0	0	0	0.71	4.1	21	29	1.03	146	2		0.71	0.58	1.95	2.21
18	39	2	2015	2	C	1A	5.53	1	0	6052	5920	1200	12	1a	0	41	2	EHG1	F4	C	2.04	3.6	46	129	89	1.17	C-CP-A	2.3	2017-08-01	4.13	<12	neg	0	0	0	1	2.48	3.7	24	25	1.17	90	1.9	C-CP-A	4.62	0.82	8.33	2.21
19	31	1	2011	6	C	1A	5.53	1	0	6052	5920	1000	12	1a	0	37	1	EHG2	F4	C	2.76	3.4	124	82	58	1.5	C-CP-B	7.45	2017-08-01	4.19	neg	neg	0	0	0	0	16.8	2.3	33	62	1.08	59	4.3	C-CP-B	4.15	3.09	3.94	5.67
20	37	2	2008	9	C	1B	4.33	1	0	6052	5920	1000	12	1a	0	48	2	N	F4	C	1.68		43	58	77	1.11	C-CP-B		2017-08-01	3.56	<12	neg	0	0	0	0	1.25	3.8	45	62	1.21	78	10	C-CP-A	2.21	2.33	4.25	4.38
21	48	1	2003	14	H	1A	5.3	1	0	6052	5920	1000	12	1a	0	62	1	N	F4	C		3.2	43	73	85	1.23	C-CP-B		2017-08-01	3.18	<12	neg	0	0	0	0	1.98	3.3	30	59	1.31	75	4.3	C-CP-A	2.52	2.31	6.29	6.9
22	60	1	2011	6	H	1B	5.42	0	1	6052			12	1a	0	67	1	EHG2	F1	H	0.83	3.5	26	41	215	1.01		4.67	2017-08-01	5.89	<12	neg	0	0	1	1	0.84	4.1	14	26	0.96	221	2.8		0.56	0.35	2.24	1.9
23	53	2	2013	4	C	1B	5.58	1	0	6052	5920	1000	12	1a	0	58	2	N	F4	C	7.02	2.6	88	111	78	1.17	C-CP-C	16.5	2017-08-01	4.46	<12	neg	1	1	1	0	1.7	3.2	39	48	1.25	77	7.7	C-CP-A	4.18	1.83	8.04	5.29
24	50	1	2013	4	H	1A	6.26	1	0	6052	5920	1000	12	1a	0	54	1	EHG2	F4	C	1.34	3.3	62	61	58		C-CP-A	22.7	2017-08-01	5.88	neg	neg	0	0	0	0	0.79	3.5	24	24	1.06	78	5.7	C-CP-A	3.09	0.9	6.84	3.14
25	54	1	2014	3	H	1A	5.72	0	1	6052			12	1a	0	58	1	N	F1	H	1.16	4	37	40	120	1.07			2017-08-01	3.6	neg	neg	0	0	0	1	1.19	4.3	21	27	1.09	122	2.9		1.08	0.62	2.96	2.61
26	42	1	2004	13	C	1B	5.77	0	1	6052	5920	1200	12	1b	0	55	1	EHG2	F4	C	1.06	3.3	61	69	72	1.06	C-CP-B	13	2017-09-01	3.44	neg	neg	0	1	0	1	0.68	3.8	37	44	1.28	80	10.6	C-CP-A	2.81	1.61	5.15	3.8
27	42	1	2008	10	C-CPB	1B	6.4	1	0	6052	5920	1000	12	1b	0	52	1	N	F4	C		2.6	59	161	142	1.12	C-CP-A	88	2017-09-01	6.38	Detectado	neg	0	0	1	0	0.5	3.6	26	43	1.09	183	10.7	C-CP-A	3.33	1.52	6.2	1.94
28	54	1	2013	4	H	1A	6.13	0	1	6052	5920	1000	12	1b	0	58	1	EHG1	F3	H	1.06	3.8	52	64	130	1.02	C-CP-A	7.2	2017-09-01	5.72	neg	neg	0	0	0	0	0.61	4.4	14	22	1.04	132	4.14	C-CP-A	1.45	0.49	3.69	2.41
29	44	1	2006	11	H	1A	5.97	1	0	6052	5920	1000	12	1a	0	55	1	N	F4	C	0.9	3.7	113	101	150	1.08	C-CP-A	50	2017-09-01	6.62	neg	neg	0	0	1	0	0.88	4.4	37	34	1.15	150	5.1	C-CP-A	1.98	0.67	2.8	1.64
30	51	1	2005	12	C	1A	6.32	1	0	6052	5920	1000	12	1a	0	62	1	N	F4	C	1.28	3.2	19	38	36		C-CP-B	5.2	2017-09-01	3.96	neg	neg	0	0	0	0	1.9	3.8	24	38	1.34	26	2.81	C-CP-A	3.1	4.3	12.3	15.2
31	48	1	2004	13	H	1A	5.78	0	1	6052	5920	1000	12	1b	0	61	1	N	F4	C	1.64	2.8	39	60	58	1.16	C-CP-A	15.2	2017-09-01	3.96	neg	neg	0	0	0	0	0.92	3.4	18	35	1.38	76	10.1	C-CP-A	3.04	1.35	7.95	5.21
32	50	2	2013	4	C	1B	6.44	1	0	6052	5920	1200	12	1b	0	54	2	N	F4	C	2.52	3.3	53	85	64	1.16	C-CP-B	15.2	2017-09-01	5.13	neg	neg	0	0	0	1	3.05	3.7	27	45	1.38	100	4.7	C-CP-A	3.9	1.32	9.12	4.33
33	64	1	2013	4	C	1A	6.66	1	0	6052	5920	1000	12	1a	0	68	1	EHG2	F4	C	1.5	3.4	78	104	63	1.23	C-CP-A	11.2	2017-09-01	5.52	Detectado	neg	0	0	0	1	1.47	3.5	27	46	1.26	67	22.2	C-CP-A	4.85	2.02	7.28	8.46
34	54	1	2010	7	H	1A	6.2	1	0	6052	5920	1000	12	1a	0	62	1	EHG2	F4	C	1.25	3.3	32	50	99		C-CP-B	6.55	2017-09-01	4.42	neg	neg	0	0	0	1	1.59	3.4	26	46	1.49		4.6	C-CP-A	1.48		4.82
35	32	2	2007	10	H	1A	6.38	1	0	6052			12	1a	VIH	42	2	EHG2	F1	H	1.5		77	88	102	1.2			2017-09-01	6.41	neg	neg	0	0	0	0	1.35	4.2	33	33	1.14	100	6.44		2.57	0.97	3.45	1.78
36	39	1	2005	12	C	1B	5.55	1	0	6052	5920	1000	12	1b	0	51	1	EHG3	F3F4	C	2.65	2	48	78	47	1.51	C-CP-B	1.22	2017-09-01	3.81	neg	neg	0	0	0	1	1.93	2.4	21	43	1.69	43	0.94	C-CP-B	4.88	2.91	9.34	8.51
37	52	1	2014	3	H	1A	4.36	1	0	6052	5920	1000	12	1a	0	55	1	EHG1	F4	C	1.23	3.6	102	112	110	1.15	C-CP-A	23.8	2017-11-01	3.32	neg	neg	0	0	1	0	0.76	4.2	25	40	1.08	124	5.32	C-CP-A	2.99	0.95	5.24	3.35
38	60	1	2008	9	H	1A	5.2	0	1	6052	5920	1000	12	1a	0	68	1	N	F4	C	3.35	2.8	68	98	62	1.27	C-CP-B	12.9	2017-11-01	5.95	neg	neg	0	0	0	0	2.75	3.2	38	58	1.28	48	4.7	C-CP-B	4.64	3.55	11.5	11.7
39	40	2	2013	4	H	1A	6.7	1	0	6052	5920	1000	12	1a	0	44	2	N	F4	C	3.38	2.8	223	329	54	1.34	C-CP-C	29.4	2017-11-01	5.88	neg	neg	0	0	1	0	3.74	2.4	36	52	1.7	43	5.73	C-CP-C	17.9	3.55	16.2	8.06
40	58	1	2013	4	H	1A	5.78	0	1	6052	5920	1000	12	1a	0	62	1	N	F4	C	1.46	3.3			104	1.12	C-CP-A	47.5	2017-12-01	4	neg	neg	1	0	1	0	0.79	3.8	26	41	1.18	97	112	C-CP-A		1.24		4.81
41	62	1	2014	3	H-A	1A	5.91	0	1	6052	5920	1000	12	1a	0	65	1	N	F4	C	0.74	3.6	55	58	146	1	C-CP-A	9.16	2018-01-01	5.63	neg	neg	0	0	0	0	0.56	4.2	18	27	1.13	149	3.51	C-CP-A	1.18	0.53	3.32	2.65
42	53	1	2011	6	H	1B	5.18	0	1	6052	5920		12	1b	0	59	1	EHG2	F4	C	1.29	3.5	110	140	67	1.18	C-CP-B	30	2018-02-01	4.13	neg	neg	0	0	0	0	1.36	3.8	20	32	1.21	79	6.6	C-CP-A	6.14	1.19	10.6	2.12
43	52	2	2010	7	H	1A	6.7	0	1	6052			12	1a	VIH	59	2	EHG1	FOF1	H	0.89	4.4	52	48	177	0.95		2.16	2018-02-01	6.21	neg	neg	0	1	0	0	0.87	4.5	21	29	0.97	180	1.43		0.86	0.47	1.96	1.83
44		1	2008	9	H			1	0	6052	5920	1000	12	1a	0	52	1				0.62	4.1	22	30	251	1.06		3.48		6.6	neg	neg	0	0	0	0	0.94	4.5	20	33	1	260	3.41		0.35	0.37	1.28	1.42
			YOD		year of detection of HCV infection				AST	aspartate aminotransferase			IU/Lt
			YWI		years with infection up to 2017				ALT	alanine aminotransferase			IU/Lt
			C	cirrohsis					INR	International Normalization Ratio
			H	chronic hepatitis					AFT	Alpha-fetoprotein		ng/mL
			IVL	initial viral load					PTS	Platelets	x1000/mm3
			NULL	null response					F1 to F4	degrees of fibrosis
			6041	Viekira Pak (OBV/PTV/r/DSV±RBV)					CPS	Child Pugh score
			5920	ribavirin (RBV)
			6052	Harvoni (SOF/LDV±RBV
			TB	Total bilirubin	mg/dL
			ALB	Albunin	g/dL
